# INFOGRAPHICS IN ANESTHESIOLOGY

Complex Information for Anesthesiologists Presented Quickly and Clearly

## THE FIRE among US: Burnout in Anesthesia

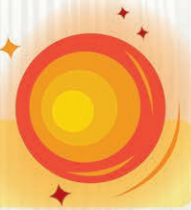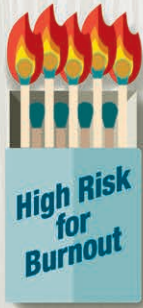

Afonso *et al.*<sup>1</sup> contacted **28,677** anesthesiologists in March 2020. 3,898 (13.6%) completed burnout assessments. Of those:

**59.2%** reported threshold levels of emotional exhaustion and/or depersonalization, putting them at **high risk for burnout.**

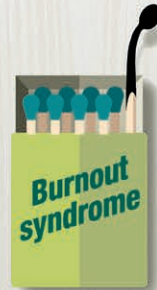

**13.8%** met criteria for **burnout syndrome**, with emotional exhaustion, depersonalization and a low sense of personal accomplishment.

### RISK FACTORS FOR EACH CONDITION WERE DETERMINED:

**Perceived lack of support at work**  
(OR 6.7, 95% CI, 5.3 to 8.5)

**Perceived lack of support at work**  
(OR 10.0, 95% CI, 5.4 to 18.3)

**Working 40+ hours/week**  
(OR 2.22, 95% CI, 1.80 to 2.75)

**Perceived lack of support at home**  
(OR 2.13, 95% CI, 1.69 to 2.69)

**LGBT status**  
(OR 2.21, 95% CI, 1.35 to 3.63)

**Lack of support in work-life contribute to anesthesiologist burnout.**

**Perceived staff shortages**  
(OR 2.06, 95% CI, 1.76 to 2.42)

**Solutions should focus on leadership skills, selfcare and balancing resources and demands.**

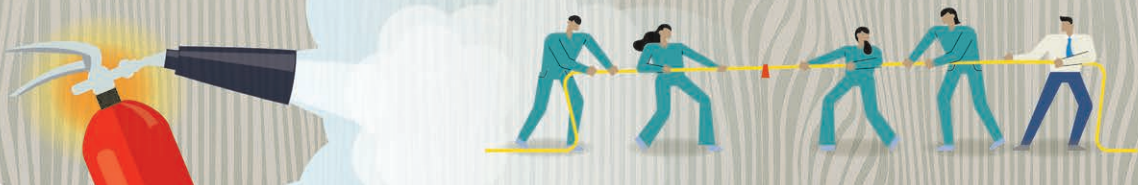

LGBT, lesbian, gay, bisexual, transgender/transsexual, queer/questioning, intersex, asexual; OR, odds ratio.

Infographic created by Jonathan P. Wanderer, Vanderbilt University Medical Center, and James P. Rathmell, Brigham and Women's Health Care/Harvard Medical School. Illustration by Annemarie Johnson, Vivo Visuals. Address correspondence to Dr. Wanderer: jon.wanderer@vumc.org.

1. Afonso AM, Cadwell JB, Staffa SJ, Zurakowski D, Vinson AE: Burnout rate and risk factors among anesthesiologists in the United States. ANESTHESIOLOGY 2021; 134:683–96
